# Supplementary material
Source: publisher figshare collection journal article supplement (https://diabetesjournals.figshare.com/articles/dataset/_/23223260)
Supplement: Supplementary file 1 [file 1]

**Tracking Ca<sup>2+</sup> dynamics in NOD mouse islets during spontaneous diabetes development**

**Short running title: Tracking pancreatic  $\alpha$ - and  $\beta$ -cells functions in NOD mice**

**Sandra Postić<sup>1</sup>, Johannes Pfabe<sup>1</sup>, Srdjan Sarikas<sup>1</sup>, Barbara Ehall<sup>2</sup>, Thomas Pieber<sup>2</sup>, Dean  
Korošak<sup>3</sup>, Marjan Slak Rupnik<sup>1,3,4,†</sup>, Ya-Chi Huang<sup>1†</sup>**

<sup>1</sup>Center for physiology and pharmacology, Medical University of Vienna, Austria

<sup>2</sup>Division of Endocrinology and Diabetology, Department of Internal Medicine, Medical  
University of Graz

<sup>3</sup>University of Maribor, Faculty of Civil Engineering, Transportation Engineering and  
Architecture

<sup>4</sup>Alma Mater Europaea – European Center Maribor, Slovenia

<sup>†</sup>Co-corresponding authors

<sup>†</sup>Ya-Chi Huang

Medical University of Vienna  
Schwarzspanierstrasse 17, 1090 Vienna, Austria

Email: ya-chi.huang.chum@ssss.gouv.qc.ca

Phone: +43 1 40160 31113

<sup>†</sup>Marjan Slak Rupnik

Medical University of Vienna  
Schwarzspanierstrasse 17, 1090 Vienna, Austria

Email: marjan.slakrupnik@meduniwien.ac.at

Phone: +43 1 40160 31113

## **Supplemental Methods and Materials:**

### **Pancreas slice preparation:**

Upon CO<sub>2</sub> euthanasia, the mouse abdominal cavity was assessed via laparotomy. 1.9% low-melting-point agarose (Lonza, USA) dissolved in extracellular solution (ECS, (in mM): 125 NaCl, 26 NaHCO<sub>3</sub>, 6 glucose, 6 lactic acid, 3 myo-inositol, 2.5 KCl, 2 Na-pyruvate, 2 CaCl<sub>2</sub>, 1.25 NaH<sub>2</sub>PO<sub>4</sub>, 1 MgCl<sub>2</sub>, 0.25 ascorbic acid) at 40°C was infused into the pancreas via the distally clamped common bile duct. The pancreas was then cooled, excised, and sliced using a vibratome (VT1000S, Leica Microsystems, Germany). The sliced pancreas (140 µm) were maintained in HEPES-ECS (in mM: 125 NaCl, 10 NaHCO<sub>3</sub>, 10 HEPES, 6 glucose, 6 lactic acid, 3 myo-inositol, 2.5 KCl, 2 Na-pyruvate, 2 CaCl<sub>2</sub>, 1.25 NaH<sub>2</sub>PO<sub>4</sub>, 1 MgCl<sub>2</sub>, 0.25 ascorbic acid; titrated to pH 7.4 using 1 M NaOH) or loaded with fluorescent Ca<sup>2+</sup> indicator in HEPES-ECS (6 µM Calbryte 520-AM (AAT Bioquest, Montluçon, France), 0.03% Pluronic F-127 (w/v), and 0.12% dimethylsulphoxide (v/v)). All chemicals were obtained from Sigma-Aldrich (St. Louis, Missouri, USA).

## **Supplementary Figure Legends**

### **Figure S1. Quantification and analysis of [Ca<sup>2+</sup>]<sub>i</sub> dynamics.**

A normal-like islet is used to demonstrate the method of quantifying and analyzing [Ca<sup>2+</sup>]<sub>i</sub> dynamics recorded in islet cells. **A:** Regions of interest (ROIs) obtained by segmentation algorithm. The numbers indicate representative ROIs whose filtered [Ca<sup>2+</sup>]<sub>i</sub> dynamics traces, representing intracellular fluorescence changes over time, are presented in **D**. A heatmap below provides color coding of the number of events detected in the ROI traces, upon a high-pass

filtering at 0.2 Hz. In the bottom histogram, ROIs with number of events below the threshold (red dashed line in the histogram in the bottom) are discarded. **B**: Halfwidth duration of  $[Ca^{2+}]_c$  events through time. Note the ranges of halfwidth duration occurring. Color indicates the statistical significance in terms of  $z$ -score (heatmap on the right). Only events with a  $z$ -score higher than 3 were included. **C**: A schematic of a transient event to describe the features of  $[Ca^{2+}]_c$  events from background subtraction of the raw data, to height and halfwidth duration. Peak-point is the time of highest amplitude of an event. **D**: *top*: time courses from ROIs indicated in **A**, exposed to a stimulation protocol of 4, 6, 8, 6mM glucose, sharing the abscissa with **B**. and are rebinned to 2 Hz (recorded 20 Hz). *Bottom*: The left panel is a closeup of the trace above to highlight the long and short  $[Ca^{2+}]_c$  events and the right panel highlights short  $[Ca^{2+}]_c$  events (in circle). **E**: in a  $z$ -score vs. halfwidth density plot. The events are clearly separated into three groups, which we named ultra-short, short, and long events. Short and long events were further analyzed since dominant pattern of glucose sensitivity was observed. **F**: Normalized Gaussian fit through the logarithmic distribution of halfwidth duration during 8mM glucose condition.

## **Figure S2. Categorization of NOD mice islets.**

Each square corresponds to the position of islets shown in **Figure 6**. The categorization assigned to each islet is depicted within the square and color-coded. Note the progressive deepening of color of the squares along the severity of diseased progression. Note also from Mouse 4 onward, each mouse harboured islets that crossed at least two islet destruction phases.

## **Table S1. Statistical analyses of $\alpha$ - and $\beta$ -cells $[Ca^{2+}]_c$ events across all islet groups.**

Data are expressed as mean of events/minute/ROI  $\pm$  Standard Error of the Mean (SEM).

68 Red font indicates outcomes of statistical analyses comparing mean values derived at different  
69 glucose concentration within the same islet groups. \* denotes  $p\text{-value}<0.05$ ; \*\*denotes  $p\text{-}$   
70  $value<0.01$ . Blue font indicates outcomes of statistical analyses comparing mean values of the  
71 normal islet group with the other islet groups within the same glucose concentration. † denotes  $p\text{-}$   
72  $value<0.05$ ; ††† denotes  $p\text{-value}<0.001$ .

73 **Table S2. Animal characteristics, *in vivo* parameters and islets analyzed.**
